## Novel risk factor for fatal arrhythmia in Brugada syndrome

R. Nishinarita<sup>1</sup>, S. Niwano<sup>1</sup>, N. Ishizue<sup>1</sup>, T. Satoh<sup>1</sup>, G. Matsuura<sup>1</sup>, Y. Arakawa<sup>1</sup>, S. Kobayashi<sup>1</sup>, Y. Shirakawa<sup>1</sup>, A. Horiguchi<sup>1</sup>, H. Nakamura<sup>1</sup>, J. Oikawa<sup>1</sup>, J. Kishihara<sup>1</sup>, H. Fukaya<sup>1</sup>, H. Niwano<sup>2</sup>, J. Ako<sup>1</sup>

<sup>1</sup>Kitasato University School of Medicine, Department of Cardiovascular Medicine, Sagami-hara, Japan; <sup>2</sup>Tamagawa University, Department of Education, Machida, Japan

**Funding Acknowledgement:** Type of funding source: None

**Background:** Brugada syndrome (BrS) is a genetic disease associated with increased risk of ventricular fibrillation (VF)/ventricular tachycardia (VT). The VF/VT in BrS occurs more frequently during a night time or at a rest with parasympathetic nerve activation. Some risk factors of VF/VT occurrence in BrS have been elucidated, however, it remains controversial about risk stratification. Salusin- $\beta$  is an endogenous bioactive peptide that systemically exerts rapid and profound hypotensive and bradycardic activities and parasympathomimetic hemodynamic actions in vivo. Previous reports suggested that salusin- $\beta$  is suppressed following physiological parasympathetic stimulation and appears to constitute a negative feedback relationship with the parasympathetic nervous system.

**Purpose:** We hypothesized that salusin- $\beta$  is associated with the occurrence of VF/VT in BrS.

**Methods:** The study population consisted of 26 BrS patients with newly implantation of implantable cardioverter defibrillator (ICD) during 2003–2008. In all patients, salusin- $\beta$  was measured in supine position after 20 minute rest. The date of salusin- $\beta$  sampling was set as the registration point for this study. The VF/VT was defined as any episode of fatal ventricular tachyarrhythmia or any appropriate shock. In accordance with the presence or absence of VF/VT events within 5 years, all patients were divided into

VF/VT group (n=6) and non-VF/VT group (n=20). Various clinical parameters were compared between the two groups. For analysis of autonomic nervous function, heart rate variability (HRV) and pupil function were evaluated.

**Results:** The mean age was  $54 \pm 17$  years old. There is no differences between the two groups in clinical parameters. In analysis of HRV, the high-frequency component (0.15–0.40 Hz; HF), low frequency component (0.04–0.15 Hz; LF) and the LF/HF ratio were analyzed over 24 h. LF/HF ratio was significantly lower over 24h in VF/VT groups in comparison with non-VF/VT groups [day-time; 1.8 (1.2–5.6) vs. 5.2 (3.4–8.8),  $p=0.048$ , night-time; 1.2 (1.1–1.3) vs. 3.9 (2.5–8.7),  $p=0.003$ ]. Furthermore, in analysis of pupil function, right/left miosis ratio was higher in VT/VF groups in comparison with non-VT/VF groups [right pupil; 0.39 (0.37–0.59) vs. 0.34 (0.28–0.38),  $p=0.035$ , left pupil; 0.43 (0.36–0.50) vs. 0.33 (0.28–0.40),  $p=0.049$ ]. In plasma total salusin- $\beta$  levels, the VF/VT groups exhibited significantly lower than non-VF/VT groups ( $55.2 \pm 14.6$  vs.  $73.2 \pm 22.2$ ,  $p=0.039$ , Figure).

**Conclusions:** Salusin- $\beta$  was associated with the occurrence of VF/VT in Brugada syndrome. Salusin- $\beta$  might be useful to identify high-risk patients for the occurrence of VT/VF events in Brugada syndrome.

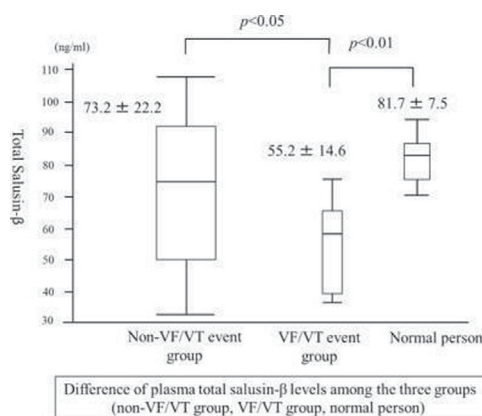

Source: http://academic.oup.com/eurheartj/article-pdf/41/Supplement_2/ehaa946.0735/34521611/ehaa946.0735.pdf
